# Supplementary material for: Injection Molded Autoclavable, Scalable, Conformable (iMASC) system for aerosol-based protection: a prospective single-arm feasibility study
Source: PubMed Central journal article supplement — BMJ Open. 2020 Jul 7;10(7):e039120. doi: 10.1136/bmjopen-2020-039120 (PMC7342850; doi:10.1136/bmjopen-2020-039120), 2020-07-07
Supplement: bmjopen-2020-039120supp001.pdf [file bmjopen-2020-039120supp001.pdf]

1 **Supplementary Information**

2

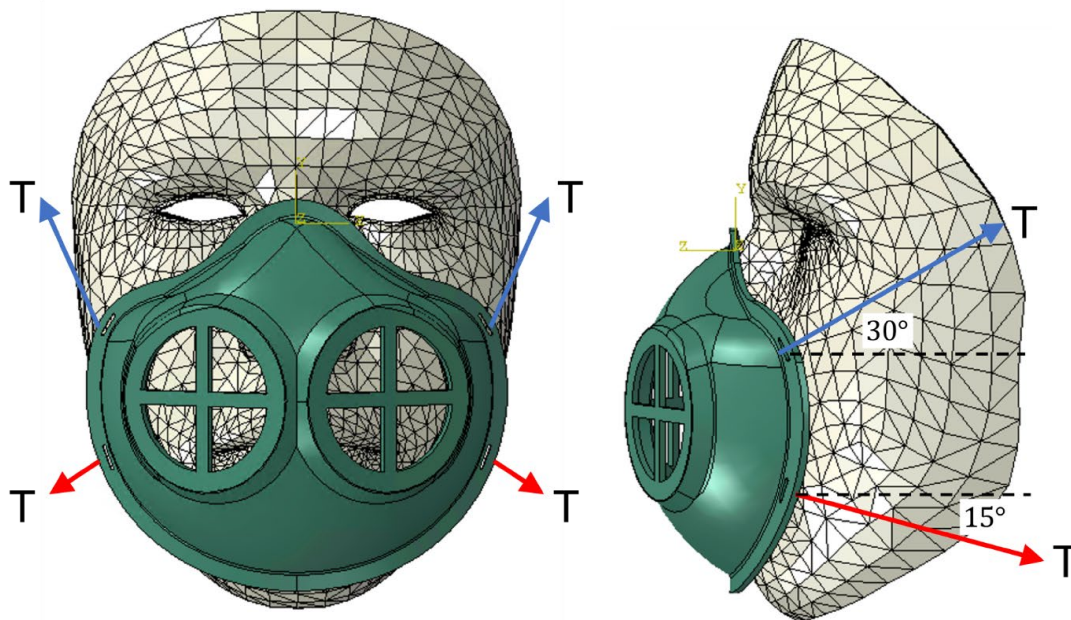

3

4

**Figure S1.** Illustration of the applied loads via mask straps.

5

6

7

8

9

10

11

12

13

14

15

16

17

18

19

20

21

22

23

24

25  
26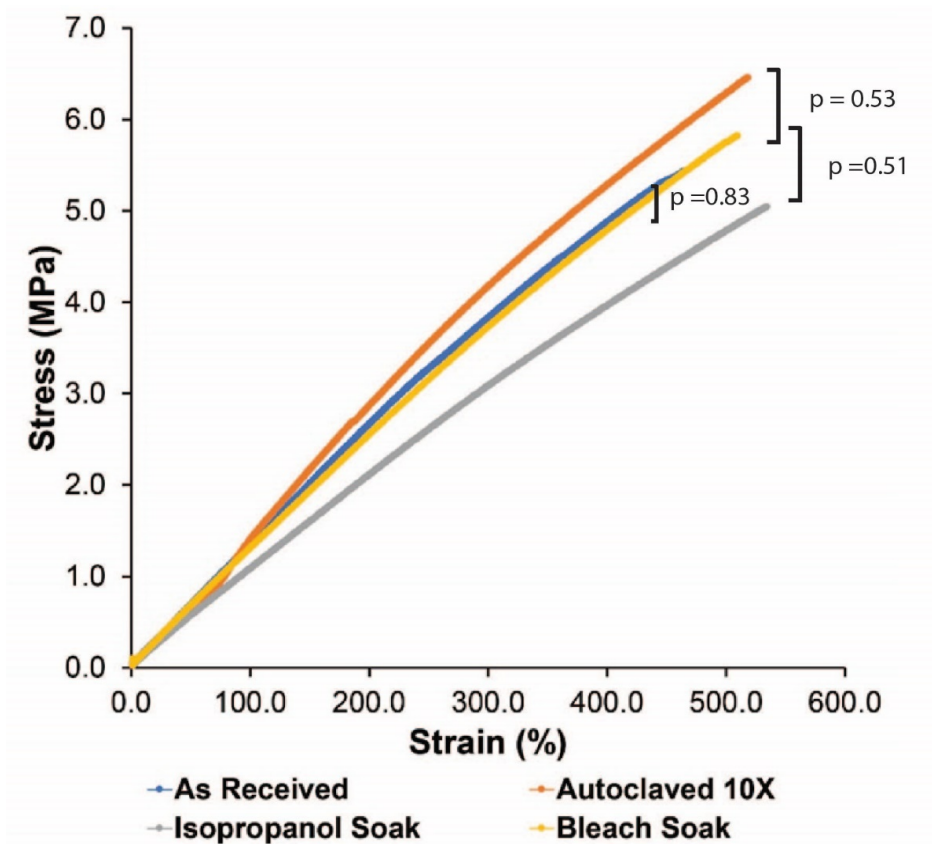

27  
28 **Figure S2.** Mechanical testing on samples cut directly from masks exposed to a variety of  
29 sterilization methods including 10 cycles of autoclaving, 10-minute soak in 10% bleach solution,  
30 and 10-minute soak in isopropanol.

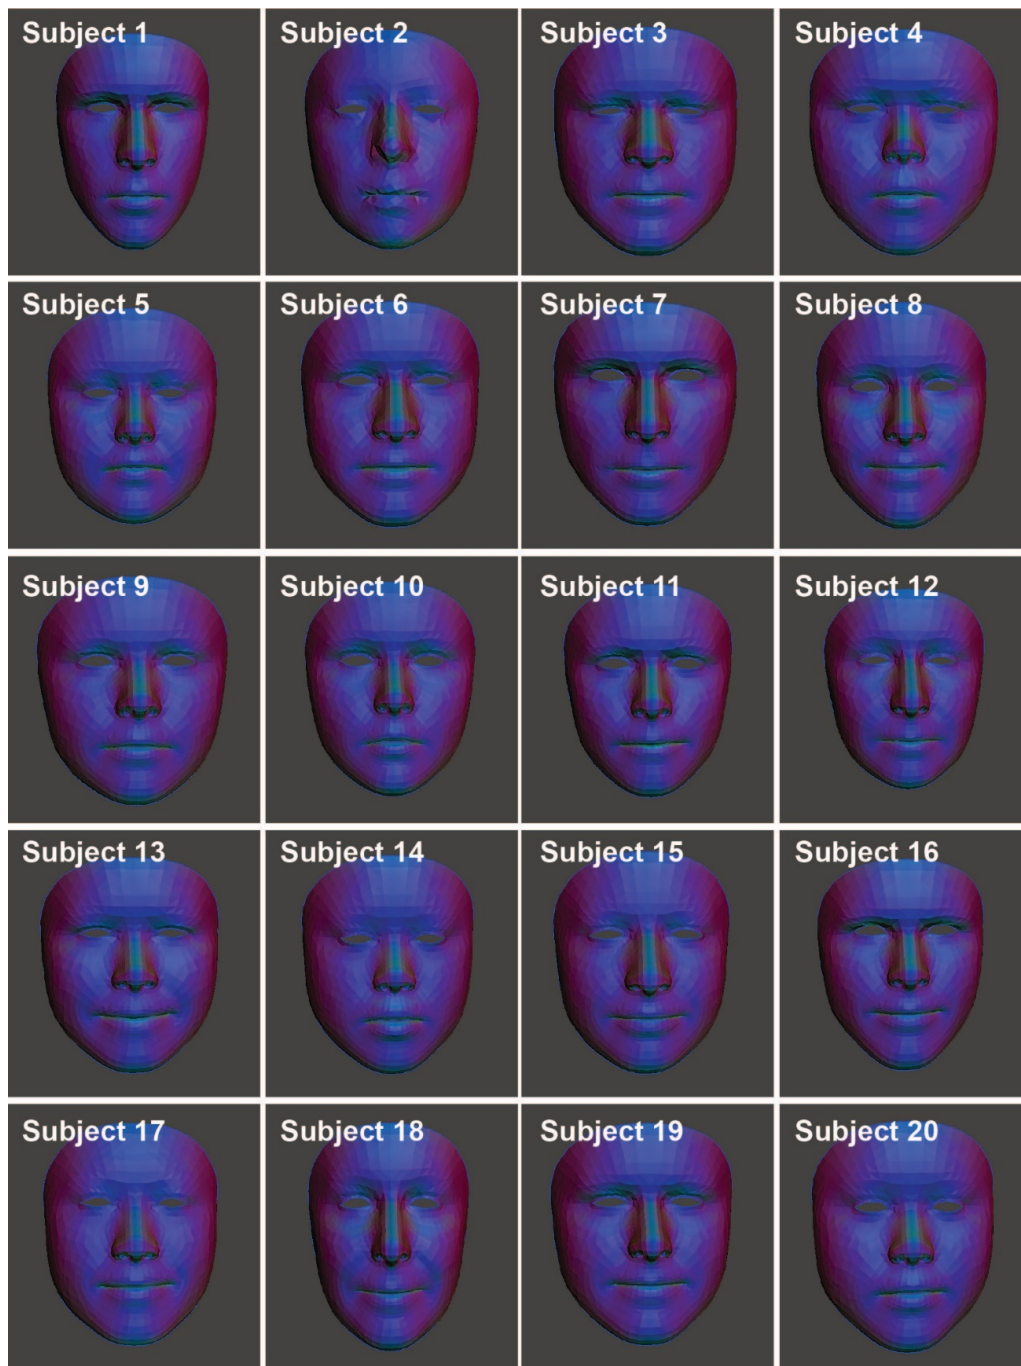

31  
32 **Figure S3.** Front view of 3D facial reconstruction of participants faces in fit trial of the iMASC  
33 system.  
34

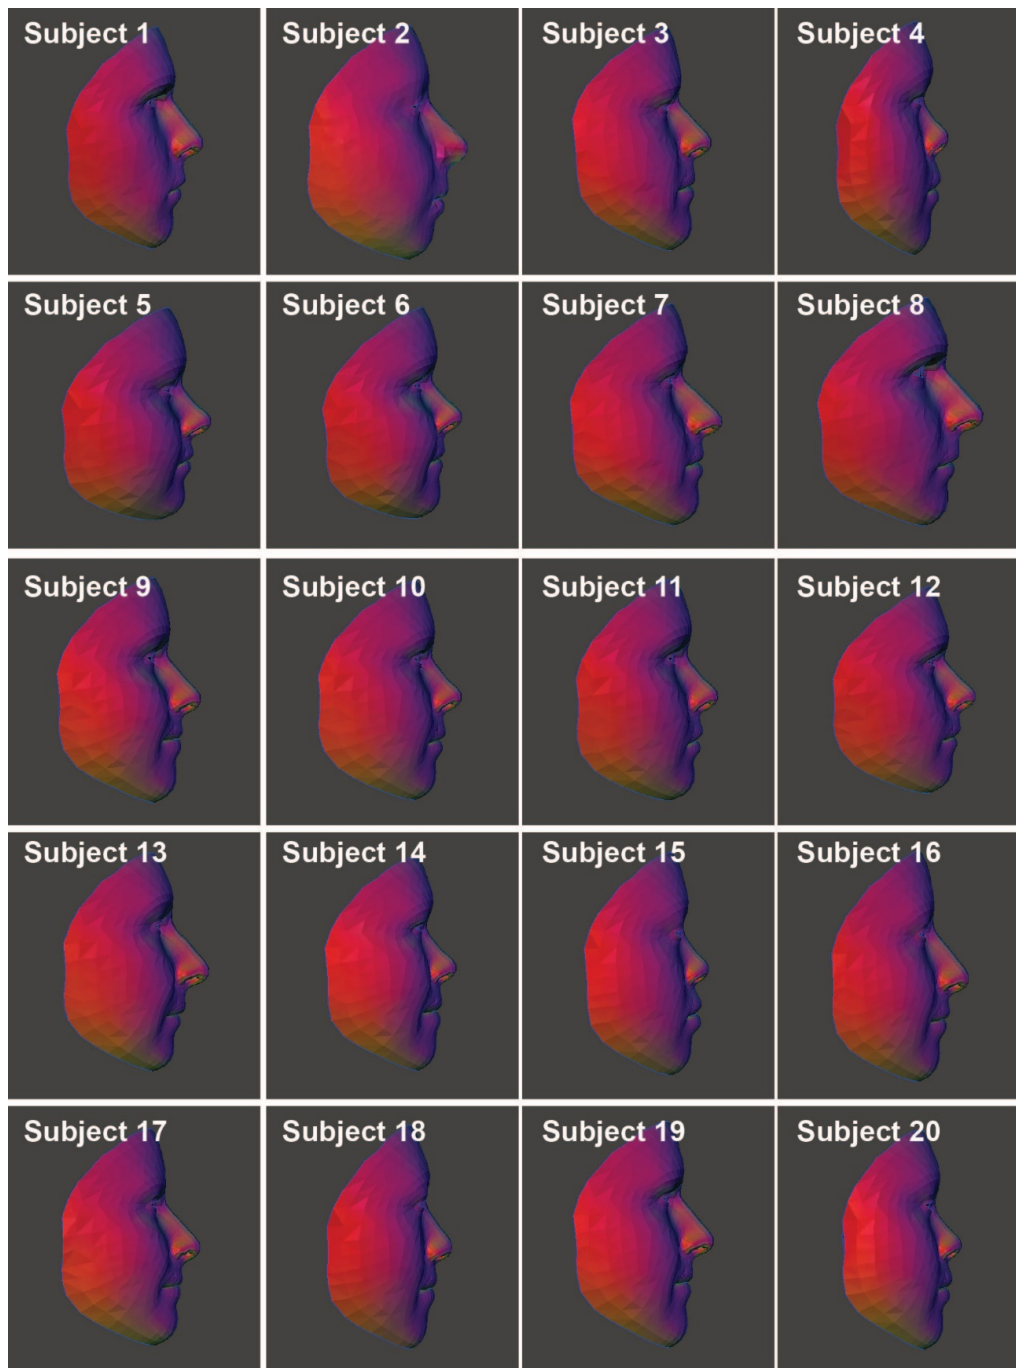

35  
36 **Figure S4.** Side view of 3D facial reconstruction of participants faces in fit trial of the iMASC  
37 system.  
38

39  
40  
41  
42  
43  
44  
45  
46

47  
48  
49**Table S1.** Array of N95 and N95-comparable technologies.

| Type                                                                                                             | Ex SUS Dollars (USD)/Unit                                                                                                                                                                                                                                                                                                                                           | Pros                                                                                                                                                                                                                  | Cons                                                                                                                                                 | Recommended Sterilization Method                                         |
|------------------------------------------------------------------------------------------------------------------|---------------------------------------------------------------------------------------------------------------------------------------------------------------------------------------------------------------------------------------------------------------------------------------------------------------------------------------------------------------------|-----------------------------------------------------------------------------------------------------------------------------------------------------------------------------------------------------------------------|------------------------------------------------------------------------------------------------------------------------------------------------------|--------------------------------------------------------------------------|
| Disposable FFR<br>              | 3M 8210Plus<br>\$1.02 USD<br><a href="https://www.mcmaster.com/5450T42">mcmaster.com/5450T42</a>                                                                                                                                                                                                                                                                    | <ul style="list-style-type: none"> <li>Ease of fit/use</li> <li>Low cost per use compared to HFRR and FFRR</li> <li>Some models come with exhaust valve</li> </ul>                                                    | <ul style="list-style-type: none"> <li>Not reusable</li> <li>If exhaust valve is available, it's not filtered</li> <li>No eye protection</li> </ul>  | N/A                                                                      |
| iMASC system<br>               | Mask:<br>< \$7.00 USD<br><br>Filter:<br>\$0.50 USD                                                                                                                                                                                                                                                                                                                  | <ul style="list-style-type: none"> <li>Low cost</li> <li>Ease/accessibility of manufacturing</li> <li>Potentially autoclavable</li> </ul>                                                                             | <ul style="list-style-type: none"> <li>No exhaust valve for humidity/ease of use relief</li> <li>No eye protection</li> </ul>                        | Autoclave, Clorox wipe, IPA wipe, detergent and sterilization agent wash |
| Half-Face Reusable (HFRR)<br> | Mask:<br>\$58.98 USD<br><a href="https://www.mcmaster.com/5541T16-5541T162">mcmaster.com/5541T16-5541T162</a><br><br>Replacement Cartridge:<br>\$14.32/pair USD<br><a href="https://www.mcmaster.com/54445T229">mcmaster.com/54445T229</a><br><br>Replacement Filter:<br>\$2.65/pair USD<br><a href="https://www.mcmaster.com/54445T189">mcmaster.com/54445T189</a> | <ul style="list-style-type: none"> <li>Powered air compatible with select models</li> <li>Exhaust valve reduces humidity and breathing resistance</li> <li>Flange/gusset provides comfortable seal skin</li> </ul>    | <ul style="list-style-type: none"> <li>Expensive</li> <li>Exhaust valve not filtered</li> <li>No eye protection</li> </ul>                           | Detergent and sterilization agent wash                                   |
| Full-Face Reusable (FFRR)<br> | Mask:<br>\$168.47 USD<br><a href="https://www.mcmaster.com/5541T28">mcmaster.com/5541T28</a><br><br>Replacement Filter:<br>\$2.65/pair USD<br><a href="https://www.mcmaster.com/54445T189">mcmaster.com/54445T189</a>                                                                                                                                               | <ul style="list-style-type: none"> <li>Best coverage</li> <li>Powered air compatible with select models</li> <li>Exhaust valve reduces humidity and breathing resistance</li> <li>Comfortable seal to skin</li> </ul> | <ul style="list-style-type: none"> <li>Expensive</li> <li>Exhaust valve not filtered</li> <li>Potential visual obstruction due to fogging</li> </ul> | Detergent and sterilization agent wash                                   |

50
